# Supplementary material
Source: PubMed Central journal article supplement (PMC4734585)
Supplement: supp_pp.15.01725_PP2015-01725_Supplemental_Materialfig1.pdf [file supp_pp.15.01725_PP2015-01725_Supplemental_Materialfig1.pdf]

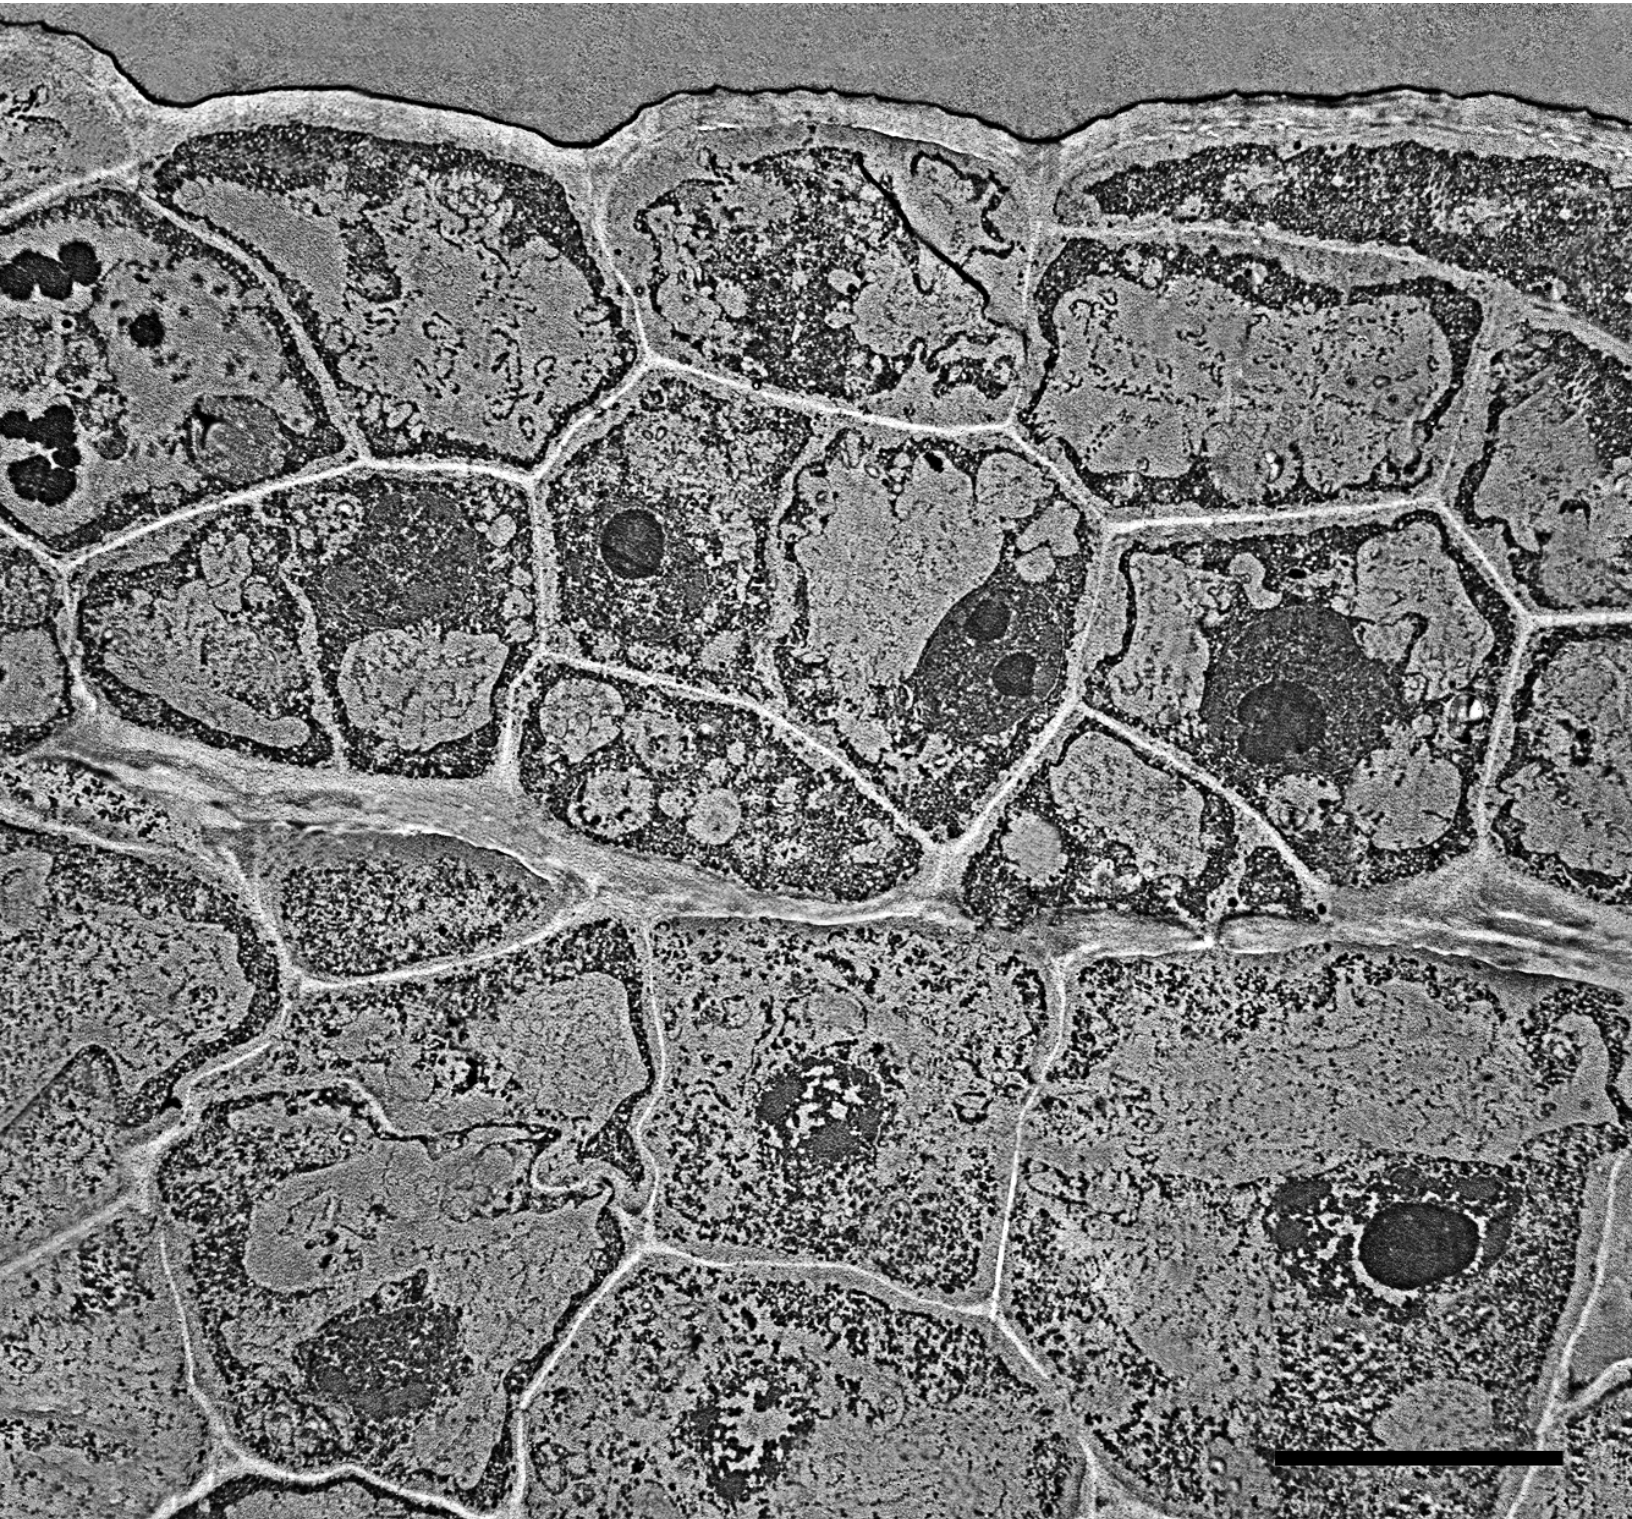

**Supplemental Figure 1.** Transmission electron micrograph of 'Cascada' fruit pericarp at 2daa. Bar 10  $\mu\text{m}$ . daa, days after anthesis.
