# Supplementary material
Source: PubMed Central journal article supplement (PMC4734585)
Supplement: supp_pp.15.01725_PP2015-01725_Supplemental_Materialfig2.pdf [file supp_pp.15.01725_PP2015-01725_Supplemental_Materialfig2.pdf]

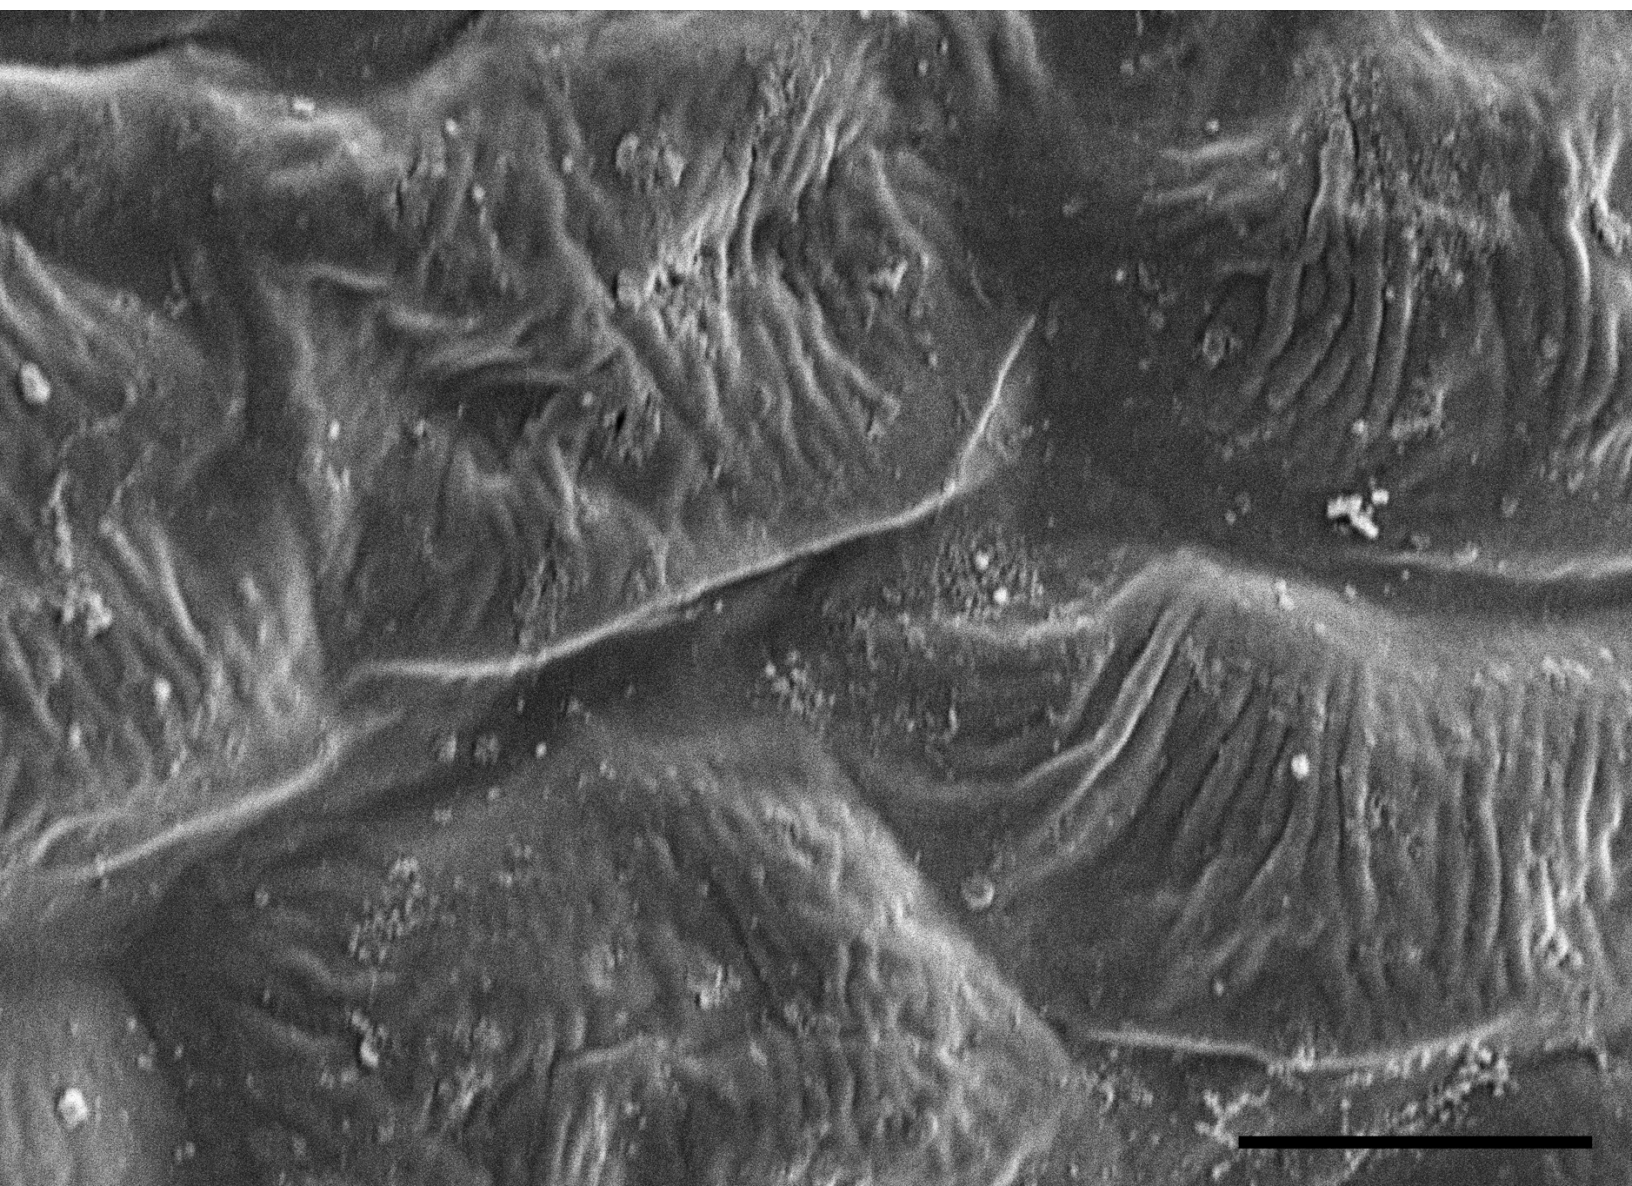

**Supplemental Figure 2.** Scanning electron micrograph of 'Cascada' fovyary surface at 2dba. Bar 5  $\mu\text{m}$ . dba, days before anthesis.
