# Supplementary material
Source: PubMed Central journal article supplement (PMC4734585)

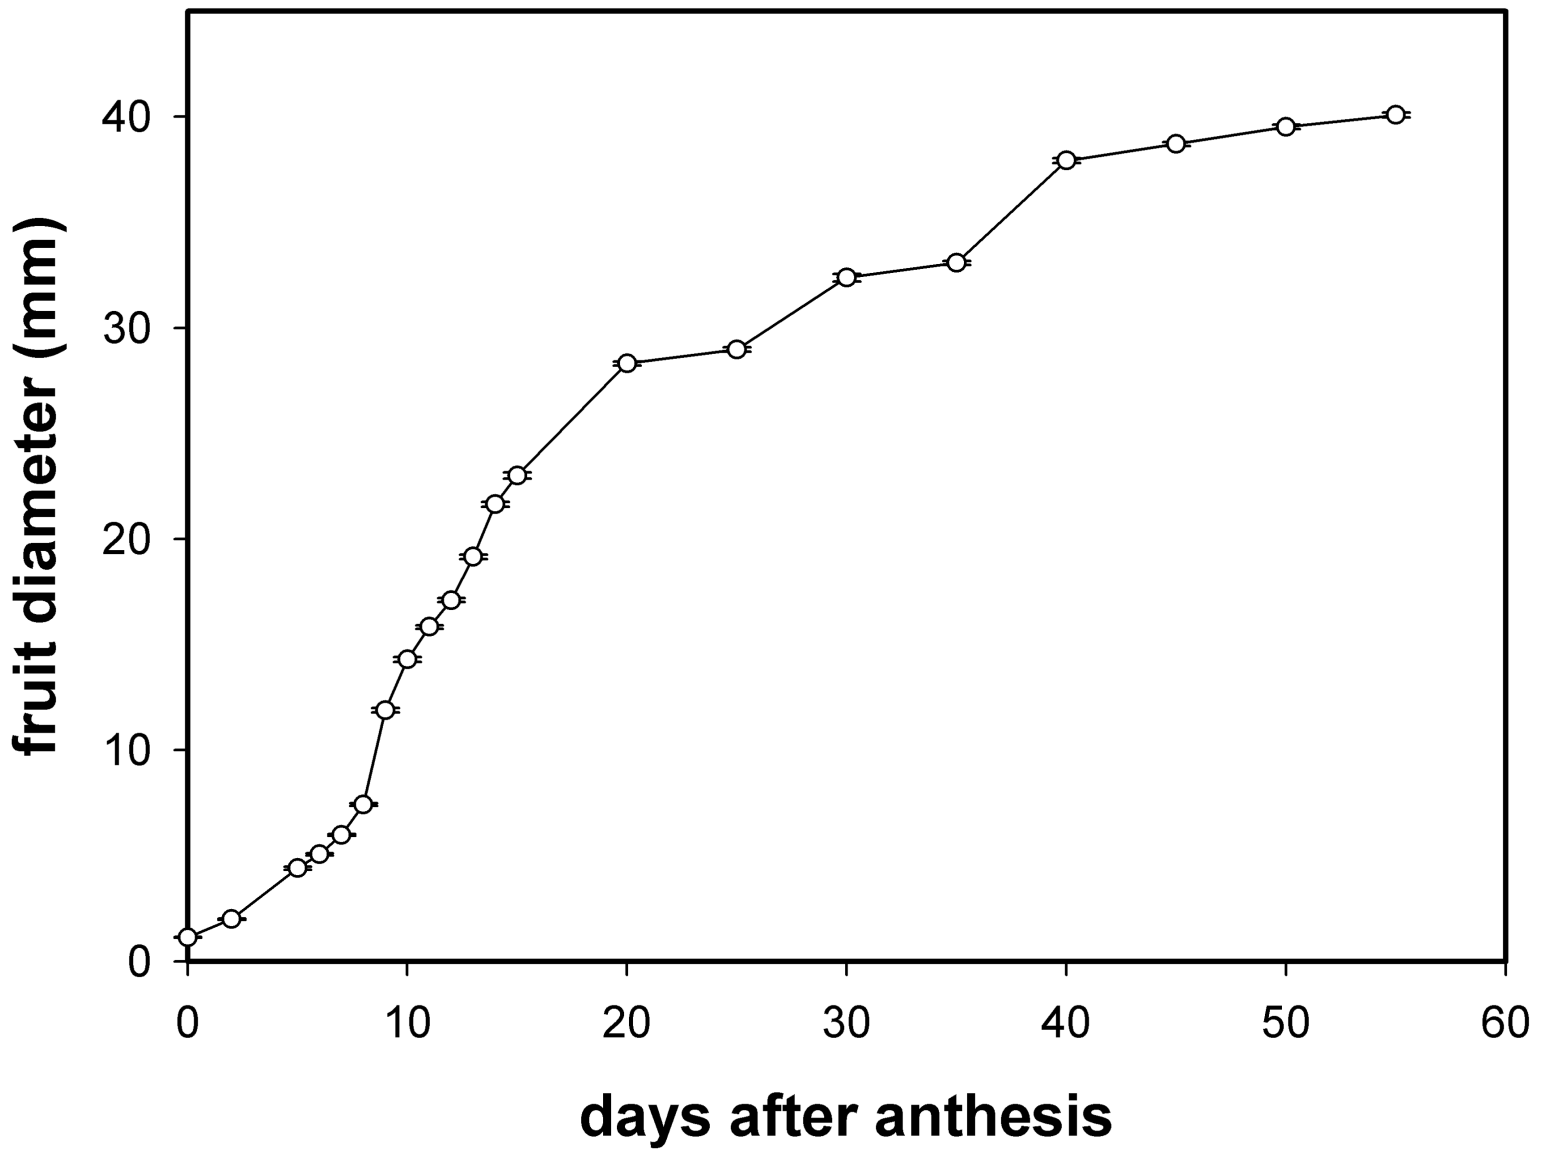

**Supplemental Figure 3.** 'Cascada' fruit diameter during development.

Supplement: supp_pp.15.01725_PP2015-01725_Supplemental_Materialfig3.pdf [file supp_pp.15.01725_PP2015-01725_Supplemental_Materialfig3.pdf]
